# Supplementary material for: Presence of B. thailandensis and B. thailandensis expressing B. pseudomallei-like capsular polysaccharide in Thailand, and their associations with serological response to B. pseudomallei
Source: PubMed Central journal article supplement (PMC5809093; doi:10.1371/journal.pntd.0006193), 2018-01-24
Supplement: pntd.0006193.s001.pdf [file pntd.0006193.s001.pdf]

**Table S1 Number of culture-positive sampling points for *B. pseudomallei* (*B. ps*), *B. thailandensis* (*B. th*) and *B. thailandensis* expressing *B. pseudomallei*-like capsular polysaccharide variant (BTCV) in 61 rice fields in the Northeast (n=21), East (n=19) and Central (n=21) Thailand**

| Regions          | Provinces         | Field* | Number of sampling points culture positive for |              |      |
|------------------|-------------------|--------|------------------------------------------------|--------------|------|
|                  |                   |        | <i>B. ps</i>                                   | <i>B. th</i> | BTCV |
| <b>Northeast</b> | Buri Rum          | NE1-1  | 87                                             | 0            | 0    |
|                  |                   | NE1-2  | 0                                              | 0            | 0    |
|                  |                   | NE1-3  | 97                                             | 1            | 0    |
|                  | Chaiyaphum        | NE2-1  | 0                                              | 0            | 0    |
|                  |                   | NE2-2  | 98                                             | 0            | 0    |
|                  |                   | NE2-3  | 0                                              | 0            | 0    |
|                  | Khonkaen          | NE3-1  | 72                                             | 0            | 0    |
|                  |                   | NE3-2  | 94                                             | 0            | 0    |
|                  |                   | NE3-3  | 35                                             | 0            | 0    |
|                  | Udonthani         | NE4-1  | 40                                             | 20           | 0    |
|                  |                   | NE4-2  | 0                                              | 27           | 0    |
|                  |                   | NE4-3  | 28                                             | 0            | 0    |
|                  | Nong Bua Lamphu   | NE5-1  | 58                                             | 0            | 0    |
|                  |                   | NE5-2  | 0                                              | 6            | 0    |
|                  |                   | NE5-3  | 48                                             | 7            | 0    |
|                  | Loei              | NE6-1  | 4                                              | 6            | 0    |
|                  |                   | NE6-2  | 0                                              | 0            | 0    |
|                  |                   | NE6-3  | 0                                              | 0            | 0    |
|                  | Nakhon Ratchasima | NE7-1  | 2                                              | 0            | 0    |
|                  |                   | NE7-2  | 0                                              | 0            | 0    |
|                  |                   | NE7-3  | 0                                              | 0            | 0    |
| <b>East</b>      | Chachoengsao      | E1-1   | 39                                             | 29           | 0    |
|                  |                   | E1-2   | 8                                              | 70           | 1    |
|                  |                   | E1-3   | 43                                             | 33           | 16   |
|                  |                   | E1-4   | 0                                              | 24           | 3    |
|                  | Prachin Buri      | E2-1   | 10                                             | 2            | 0    |
|                  |                   | E2-2   | 6                                              | 0            | 0    |
|                  |                   | E2-3   | 0                                              | 16           | 10   |
|                  | Sa Kaeo           | E3-1   | 17                                             | 0            | 0    |
|                  |                   | E3-2   | 0                                              | 0            | 0    |
|                  |                   | E3-3   | 81                                             | 1            | 0    |
|                  | Chanthaburi       | E4-1   | 16                                             | 0            | 0    |

| Regions | Provinces    | Field*     | Number of sampling points<br>culture positive for |              |      |
|---------|--------------|------------|---------------------------------------------------|--------------|------|
|         |              |            | <i>B. ps</i>                                      | <i>B. th</i> | BTCV |
| Central | Chon Buri    | E4-2       | 1                                                 | 16           | 0    |
|         |              | E4-3       | 0                                                 | 0            | 0    |
|         |              | E5-1       | 3                                                 | 0            | 0    |
|         |              | E5-2       | 32                                                | 0            | 0    |
|         |              | E5-3       | 0                                                 | 44           | 3    |
|         |              | E6-1       | 1                                                 | 11           | 0    |
|         | Rayong       | E6-2       | 0                                                 | 100          | 24   |
|         |              | E6-3       | 57                                                | 54           | 2    |
|         |              | Phetchabun | C1-1                                              | 0            | 0    |
|         | Phitsanulok  | C1-2       | 0                                                 | 0            | 0    |
|         |              | C1-3       | 3                                                 | 7            | 0    |
|         |              | C2-1       | 1                                                 | 74           | 2    |
|         | Pathum Thani | C2-2       | 1                                                 | 70           | 8    |
|         |              | C2-3       | 0                                                 | 0            | 0    |
|         |              | C3-1       | 0                                                 | 0            | 0    |
|         | Saraburi     | C3-2       | 0                                                 | 2            | 0    |
|         |              | C3-3       | 0                                                 | 2            | 0    |
|         |              | C4-1       | 0                                                 | 85           | 6    |
|         | Lop Buri     | C4-2       | 0                                                 | 1            | 0    |
|         |              | C4-3       | 0                                                 | 26           | 1    |
|         |              | C5-1       | 0                                                 | 0            | 0    |
|         | Nakhon Nayok | C5-2       | 0                                                 | 0            | 0    |
|         |              | C5-3       | 0                                                 | 0            | 0    |
|         |              | C6-1       | 63                                                | 0            | 0    |
|         | Bangkok      | C6-2       | 1                                                 | 65           | 0    |
|         |              | C6-3       | 0                                                 | 0            | 0    |
|         |              | C7-1       | 0                                                 | 6            | 0    |
|         | C7-2         | 0          | 13                                                | 0            |      |
|         | C7-3         | 0          | 8                                                 | 0            |      |

\* Each rice field was divided into a grid system, in which 100 sampling points (10 by 10) were plotted 2.5 m apart. At each sampling point, 10 g of soil at 30 cm depth was collected and cultured for *B. pseudomallei*, *B. thailandensis* and BTCV.
