# Supplementary material for: Presence of B. thailandensis and B. thailandensis expressing B. pseudomallei-like capsular polysaccharide in Thailand, and their associations with serological response to B. pseudomallei
Source: PubMed Central journal article supplement (PMC5809093; doi:10.1371/journal.pntd.0006193), 2018-01-24
Supplement: pntd.0006193.s002.pdf [file pntd.0006193.s002.pdf]

**Table S2 Soil physicochemical properties associated with the presence of *B. thailandensis* in univariable logistic regression models**

| Soil physicochemical characteristics | Rice fields positive for <i>B. thailandensis</i> <sup>1</sup> (n=30) | Rice fields negative for <i>B. thailandensis</i> <sup>1</sup> (n=31) | Crude odds ratio (95% confidence interval) | p value |
|--------------------------------------|----------------------------------------------------------------------|----------------------------------------------------------------------|--------------------------------------------|---------|
| <b>Physical factors</b>              |                                                                      |                                                                      |                                            |         |
| • Sand (%)                           | 13.2 (4.3-78.8)                                                      | 18.2 (7.8-81.0)                                                      | 0.98 (0.96-1.01)                           | 0.19    |
| • Silt (%)                           | 34.8 (9.7-56.3)                                                      | 33.1 (11.1-57.2)                                                     | 1.03 (0.99-1.07)                           | 0.16    |
| • Clay (%)                           | 46.7 (11.5-58.6)                                                     | 45.2 (7.3-57.6)                                                      | 1.01 (0.97-1.05)                           | 0.54    |
| • Moisture (% w/w)                   | 14.6 (2.5-28.3)                                                      | 12.8 (4.0-0.0)                                                       | 1.05 (0.96-1.15)                           | 0.32    |
| <b>Acidity and salinity factors</b>  |                                                                      |                                                                      |                                            |         |
| • pH                                 | 6.6 (4.9-7.8)                                                        | 6.8 (5.0-8.1)                                                        | 0.54 (0.27-1.09)                           | 0.09    |
| • Electrical conductivity (dS/m)     | 0.3 (0.0-1.5)                                                        | 0.4 (0.0-1.2)                                                        | 1.14 (0.28-4.59)                           | 0.85    |
| • Lime requirement (kg/100sqm)       | 7.5 (0.0-30.0)                                                       | 5.4 (0.0-23.0)                                                       | 1.01 (0.95-1.08)                           | 0.73    |
| <b>Chemical factors</b>              |                                                                      |                                                                      |                                            |         |
| • Total nitrogen (mg/kg)             | 682 (330-2442)                                                       | 643 (175-1,380)                                                      | 1.01 (0.99-1.03) <sup>2</sup>              | 0.10    |
| • Available phosphorous (mg/kg)      | 8.1 (0.6-28)                                                         | 5.6 (0.2-38)                                                         | 1.11 (0.60-2.04) <sup>2</sup>              | 0.75    |
| • Exchangeable potassium (mg/kg)     | 57.5 (13.5-184)                                                      | 58.2 (10.5-252)                                                      | 0.98 (0.87-1.09) <sup>2</sup>              | 0.65    |
| • Exchangeable calcium (mg/kg)       | 808 (494-2,182)                                                      | 945 (272-4,326)                                                      | 0.99 (0.99-1.00) <sup>2</sup>              | 0.11    |
| • Available magnesium (mg/kg)        | 212 (44-616)                                                         | 169 (47-823)                                                         | 1.00 (0.97-1.03) <sup>2</sup>              | 0.85    |
| • Extractable sulphur (mg/kg)        | 19 (2.2-114)                                                         | 12 (0-74)                                                            | 1.19 (0.96-1.48) <sup>2</sup>              | 0.12    |
| • Exchangeable sodium (mg/kg)        | 144 (94-241)                                                         | 161 (88.5-241)                                                       | 0.91 (0.79-1.05) <sup>2</sup>              | 0.21    |
| • Total iron (Fe; g/kg)              | 24 (1.9-96)                                                          | 33 (0.6-79.6)                                                        | 0.98 (0.77-1.24) <sup>2</sup>              | 0.87    |
| • Total cadmium                      |                                                                      |                                                                      |                                            |         |
| o not detected                       | 19 fields (63%)                                                      | 17 fields (55%)                                                      | 1.0                                        |         |
| o detected                           | 11 fields (37%)                                                      | 14 fields (45%)                                                      | 0.70 (0.27-1.84)                           | 0.50    |
| • Cation exchange capacity (cmol/mg) | 7.6 (0.6-44)                                                         | 12 (2-48)                                                            | 0.99 (0.95-1.04)                           | 0.75    |
| <b>Biological related factors</b>    |                                                                      |                                                                      |                                            |         |
| • Organic matter (% w/w)             | 0.8 (0.2-2.4)                                                        | 0.9 (0.2-2.8)                                                        | 0.78 (0.35-1.72)                           | 0.53    |
| • Carbon to nitrogen ratio           | 6.3 (2.0-22.6)                                                       | 9.5 (2.3-42.6)                                                       | 0.92 (0.83-1.02)                           | 0.10    |

<sup>1</sup>Median (range) unless otherwise specified.

<sup>2</sup>Odds ratio for an increase of 100 mg/kg in nutrient.
