# Supplementary material for: Presence of B. thailandensis and B. thailandensis expressing B. pseudomallei-like capsular polysaccharide in Thailand, and their associations with serological response to B. pseudomallei
Source: PubMed Central journal article supplement (PMC5809093; doi:10.1371/journal.pntd.0006193), 2018-01-24
Supplement: pntd.0006193.s003.pdf [file pntd.0006193.s003.pdf]

**Table S3 Soil physicochemical properties associated with the presence of *B. thailandensis* expressing *B. pseudomallei*-like capsular polysaccharide (BTCV) in univariable logistic regression models**

| Soil physicochemical characteristics | Rice fields positive for BTCV <sup>1</sup> (n=11) | Rice fields negative for BTCV <sup>1</sup> (n=50) | Crude odds ratio (95% confidence interval) | p value |
|--------------------------------------|---------------------------------------------------|---------------------------------------------------|--------------------------------------------|---------|
| <b>Physical factors</b>              |                                                   |                                                   |                                            |         |
| • Sand (%)                           | 14.7 (9.8-42.1)                                   | 15.1 (4.3-81.0)                                   | 0.97 (0.93-1.02)                           | 0.22    |
| • Silt (%)                           | 32.3 (29.3-56.3)                                  | 34.6 (9.7-57.2)                                   | 1.03 (0.98-1.09)                           | 0.27    |
| • Clay (%)                           | 45.5 (27.3-58.6)                                  | 45.6 (7.3-57.6)                                   | 1.02 (0.97-1.08)                           | 0.41    |
| • Moisture (% w/w)                   | 15.4 (10.4-19.5)                                  | 12.9 (2.5-0.0)                                    | 1.05 (0.94-1.18)                           | 0.35    |
| <b>Acidity and salinity factors</b>  |                                                   |                                                   |                                            |         |
| • pH                                 | 6.6 (5.1-7.8)                                     | 6.7 (4.9-8.1)                                     | 0.67 (0.29-1.57)                           | 0.35    |
| • Electrical conductivity (dS/m)     | 0.2 (0.1-1.5)                                     | 0.4 (0.0-1.4)                                     | 0.71 (0.11-4.76)                           | 0.72    |
| • Lime requirement (kg/100sqm)       | 7.6 (5.8-22.5)                                    | 6.0 (0.0-30.0)                                    | 1.05 (0.97-1.14)                           | 0.22    |
| <b>Chemical factors</b>              |                                                   |                                                   |                                            |         |
| • Total nitrogen (mg/kg)             | 792.0 (330-2,442)                                 | 599.9 (175-1,601)                                 | 1.02 (1.00-1.03) <sup>2</sup>              | 0.04    |
| • Available phosphorous (mg/kg)      | 12.2 (4-28)                                       | 6.1 (0.2-38)                                      | 1.95 (0.95-4.00) <sup>2</sup>              | 0.07    |
| • Exchangeable potassium (mg/kg)     | 57 (31.7-114.8)                                   | 58 (10.5-252)                                     | 0.93 (0.79-1.10) <sup>2</sup>              | 0.41    |
| • Exchangeable calcium (mg/kg)       | 841 (696-1,680)                                   | 822 (272-4,326)                                   | 0.99 (0.98-1.00) <sup>2</sup>              | 0.28    |
| • Available magnesium (mg/kg)        | 193 (123-292)                                     | 174 (44-823)                                      | 0.98 (0.94-1.03) <sup>2</sup>              | 0.42    |
| • Extractable sulphur (mg/kg)        | 18 (4.3-75)                                       | 18 (0-114)                                        | 1.01 (0.78-1.31) <sup>2</sup>              | 0.95    |
| • Exchangeable sodium (mg/kg)        | 144 (108-241)                                     | 151 (88.5-241)                                    | 1.02 (0.85-1.22) <sup>2</sup>              | 0.83    |
| • Total iron (Fe; g/kg)              | 3 (0.4-5.9)                                       | 2.8 (0.1-9.6)                                     | 0.97 (0.71-1.33)                           | 0.85    |
| • Total cadmium                      |                                                   |                                                   |                                            |         |
| o not detected                       | 6 fields (55%)                                    | 30 fields (60%)                                   | 1.0                                        |         |
| o detected                           | 5 fields (45%)                                    | 20 fields (40%)                                   | 1.25 (0.34-4.65)                           | 0.74    |
| • Cation exchange capacity (cmol/mg) | 4.7 (0.6-21.9)                                    | 13 (2-48)                                         | 0.92 (0.85-1.00)                           | 0.05    |
| <b>Biological related factors</b>    |                                                   |                                                   |                                            |         |
| • Organic matter (% w/w)             | 0.8 (0.3-1.5)                                     | 0.9 (0.2-2.8)                                     | 0.47 (0.13-1.61)                           | 0.23    |
| • Carbon to nitrogen ratio           | 5.6 (2.0-11.7)                                    | 9.1 (2.3-42.6)                                    | 0.81 (0.65-1.00)                           | 0.05    |

<sup>1</sup>Median (range) unless otherwise specified.

<sup>2</sup>Odds ratio for an increase of 100 mg/kg in nutrient.
