# Supplementary material for: Presence of B. thailandensis and B. thailandensis expressing B. pseudomallei-like capsular polysaccharide in Thailand, and their associations with serological response to B. pseudomallei
Source: PubMed Central journal article supplement (PMC5809093; doi:10.1371/journal.pntd.0006193), 2018-01-24
Supplement: pntd.0006193.s004.pdf [file pntd.0006193.s004.pdf]

**Table S4 Soil physicochemical properties associated with the presence of *B. thailandensis* expressing *B. pseudomallei*-like capsular polysaccharide in a multivariable logistic regression model**

| Soil physicochemical characteristics | Adjusted odds ratio<br>(95% confidence interval) | p value |
|--------------------------------------|--------------------------------------------------|---------|
| Total nitrogen (mg/kg)               | 1.04 (1.01 - 1.07) <sup>1</sup>                  | 0.01    |
| Cation exchange capacity (cmol/mg)   | 0.86 (0.76 - 0.97)                               | 0.01    |

<sup>1</sup>Odds ratio for an increase of 100 mg/kg in nutrient
