# Supplementary material for: Presence of B. thailandensis and B. thailandensis expressing B. pseudomallei-like capsular polysaccharide in Thailand, and their associations with serological response to B. pseudomallei
Source: PubMed Central journal article supplement (PMC5809093; doi:10.1371/journal.pntd.0006193), 2018-01-24
Supplement: pntd.0006193.s005.pdf [file pntd.0006193.s005.pdf]

**Table S5. Reports of *B. thailandensis* expressing *B. pseudomallei*-like capsular polysaccharide worldwide from 1921 to 2016.**

| Year      | Strains                                                                                                                                                                                                                                                                                                 | Sequence type (allele profile)* | Sources                                                                                                          | References                                                   |
|-----------|---------------------------------------------------------------------------------------------------------------------------------------------------------------------------------------------------------------------------------------------------------------------------------------------------------|---------------------------------|------------------------------------------------------------------------------------------------------------------|--------------------------------------------------------------|
| 2003      | CDC3015869                                                                                                                                                                                                                                                                                              | 101<br>(6-5-9-11-14-20-14)      | Blood of a 2-year-old male presenting with drowning, post-cardiac arrest, pneumonia and septicemia in Texas, USA | [38]                                                         |
| 2008      | E555                                                                                                                                                                                                                                                                                                    | 696<br>(6-5-9-11-7-20-14)       | Soil in Cambodia                                                                                                 | [19]                                                         |
| 2012      | A-330-05-1-04                                                                                                                                                                                                                                                                                           | 696                             | Water (tap water) in Ubon Ratchathani, northeast Thailand<br>**                                                  | [34]                                                         |
| 2012-2013 | D50                                                                                                                                                                                                                                                                                                     | 1126<br>(6-5-9-5-7-7-5)         | Soil in Gabon                                                                                                    | [37]                                                         |
| 2013      | ST_10                                                                                                                                                                                                                                                                                                   | 696                             | Water in Laos                                                                                                    | [39] and personal communication: DABD and Dr Sabine Dittrich |
| 2013-2014 | SBXCB001a, SBXCB002a, SBXCB003a, SBXCC001a, SBXCC002a, SBXCC005a, SBXCC008a, SBXCC014b, SBXCC019a, SBXCC020a, SBXPL001a, SBXPL002a, SBXPL005a, SBXPL007a, SBXPL010a, SBXPR001a, SBXPR002a, SBXPR005a, SBXRY001a, SBXRY017a, SBXRY019a, SBXRY030a, SBXRY031a, SBXSR003a, SBXSR004a, SBXSR005a, SBXSR007a | 696                             | Soil in East and Central Thailand                                                                                | This study                                                   |

\* The *B. pseudomallei* MLST allele profile corresponds to the gene order *ace-gltB-gmhD-lepA-lipA-narK-ndh* [27].

\*\* Previously reported as *B. pseudomallei*
